# Supplementary material
Source: PubMed Central journal article supplement (PMC3093506)
Supplement: 1017664108_pnas.201017664SI.pdf [file 1017664108_pnas.201017664SI.pdf]

# Supporting Information

Gorgoni et al. 10.1073/pnas.1017664108

## SI Methods

**Plasmid Construction. Expression plasmids.** Upstream ATGs in pGemT-easy (Promega) were mutated to increase translation efficiency by insertion of annealed oligonucleotides into the AatII–SacII sites, creating ATG-pGem. The sequences of oligonucleotides used were CGCTTGCTCCCGGCCGCTTGGCGGCCGC and GGCCGCCAAGGCGGCCGGGAGCAAGCGACGT.

The poly(A)-binding protein (PABP) 1 rescue construct, PABP1Res, was generated by PCR using primers CAGTCA-CAATTGATGAATCCCAGTGCTCCC and CAGTCACTCG-AGTTAAGCAGTTGGCACTCC and ligated into ATG-pGem. ePABPwobble was constructed to introduce silent mutations in the embryonic PABP (ePABP) coding sequence to make it resistant to morpholino antisense oligonucleotides. ePABP was amplified with two sequential PCR reactions: first with primers GGGGAATTCGATTATGAATGCAACCGGTGCTGGATAT-CCGC (sense) and GGGGAATTCTCAGATCAAAGATGGT-TGGGCAC (antisense) and then with GGGGAATTTCGATTA-TGAATGCTACTGGTGTGATATCCGC (sense) and same antisense primer. The EcoRI-digested product was ligated into ATG-pGem.

FLAG-tagged PABP1 (PABP1-FLAG) and PABP4 (PABP4-FLAG) were generated by PCR using primers CAGTCA-GAGCTCATATGAATCCCAGTGCTCCCAGCTACCCAAT-GGCTTCC and CAGTCAAAGCTTTTATTTGTCATCGTC-GTCCTTGTAGTCCATAGCAGTTGGCACTCCAGTTGC or CAGTCAGAGCTCATATGCACACAGCTACTAGCAGTTA-TCC and CAGTCAAAGCTTTTATTTGTCATCGTCGTCCTT-GTAGTCCATAGAGGTAGCTGTGACAATTCCCAC, respectively. SacI–HindIII–digested products were inserted into pET28c (Novagen). A construct in which the C terminus of PABP1 was appended to the RNA recognition motifs (RRM) region of ePABP (eRRM/1Ct) was created by replacing an NheI–SalI fragment of ePABPwobble with the corresponding C-terminal region of PABP1, which was generated by PCR from PABP1Res with primers CCC-GCTAGCCACTGTTCGTGTACCAATCC and CATATGG-TCGACCTGCAGGCGGCCGC and cut with NheI and SalI before ligation. To create a construct in which the ePABP C terminus was appended to the RRM of PABP1 (1RRM/eCt), silent mutations were introduced into PABP1Res by site-directed mutagenesis to create an NheI site. The resulting plasmid (pGEM-PABP1mNheI) was digested with NheI–SalI to liberate the C terminus, which was replaced with the corresponding region of ePABP by ligation of a PCR product generated from ePABPwobble using primers CCCGCTAGCATGAGGGCGATGCC-TGGTCCTCTC and CATATGGTTCGACCTGCAGGCGGCCGC and digested with NheI and SalI.

Glutathione S-transferase (GST)–PABP1 and GST–ePABP were generated by PCR using primers CCCCAATTGATGAAT-CCCAGTGCTCCCAGCTAC and CCCGCGGCCGCTTAAG-CAGTTGGCACTCCAGTTGC or CCCCAATTGATGAATG-CAACCGGAGCCGGATATCC and CCCGCGGCCGCTCA-GATCAAAGATGGTTGGGCAC, respectively. MfeI–NotI–digested products were inserted into pGEX-5x-1 (Pharmacia) digested with EcoRI–NotI. GST–PABP4 was generated by PCR using primers CCCGATCCCCATGCACACAGC TACT-AGCAGTTATCC and CCCGCGGCCGC TCAAGAGGTAG-CTGTGACAATTCCC, and the product and pGEX-5x-1 were digested with BamHI–NotI before ligation.

**Tethered-function assay plasmids.** pMS2-PABP1 (previously known as “MS2-PAB”), pLG-MS2 (Luc-MS2), pLGENB1 (Luc-ΔMS2), pJK350 (β-galactosidase) (1), pMSPN, and pMS2-ePABP (2) have

been described previously. pMS2-PABP4 was generated by PCR with primers CAGTCACTCGAGATGCACACAGCTACTAGC and TCTGAGACTAGTTCAAGAGGTAGCTGTGAC. The XhoI–SpeI–digested product was ligated into pMSPN.

**Yeast two-hybrid plasmids.** pLexA-MS2, pACT-IRP, pACT-4Gnt, pBTM-PABP1 1–2, pBTM-PABP1Ct, pACT-PAIP1 (1), pBTM-ePABP1-2, pBTM-ePABPCt (2), and pACT-xDazl (3) have been described previously. pBTM-PABP4Nt was created by PCR using primers CTAGCAGCTAGCAATGCACACAGCTACTA-GCAGTTATCC and CTAGCAGGATCCCTAACGACACCC-ATATTTGCTAAACGTCTCCTTTAATCGCTC. The NheI–BamHI product was ligated into pBTMKnDB (gift from David Bernstein, University of Wisconsin-Madison, Madison, WI) digested with AvrII–BamHI. pBTM-PABP4Ct and pGAD-PABP4Ct were created by PCR using primers CAGTCAGAA-TTCCTTATCAACCAGTTCCAGCCTGCACC and CAGTCA-GGATCCTCAAGAGGTAGCTGTGACAATTCC. The PCR product and pBTMKnDB and pGADT7 (Clontech) were digested with EcoRI–BamHI before ligation. pGAD-PABP1Ct and pGAD-ePABPCt were created by PCR using primers GTC-AGTGAATTCATCAACCCATACCAGCCACCAC and GTCA-GTGGATCCTTAAGCAGTTGGCACTCCAGTTG or GTCA-GTGAATTCCTCCTTGGGTCCTTCCAG and GTCAGTGGA-TCCTCAGATCAAAGATGGTTG, respectively. EcoRI–BamHI products were ligated into pGADT7. pACT-PAIP2 was created by PCR using primers CAGTCACCATGGCTATGAAAGATC-CAAGTCGCAGC and CAGTCAGGATCCTCAAATATTTT-CGTACTTCCACCCC. NcoI–BamHI products were ligated into pACT2. pGBT9-eRF3 (4) was a kind gift of Bertrand Cosson (University of Rennes, Rennes, France).

**In Vitro Translation.** PABP1, ePABP, and PABP4 proteins were expressed from EST clones (IMAGE IDs 5542430, 4032449, and 5516025, respectively) using the TNT/SP6 system (Promega) supplemented with 10 μCi [<sup>35</sup>S]methionine and 4 μM morpholino.

**Bioinformatics.** Analyses were performed using the following sequences:

*Xenopus laevis*: Poly(A)-binding protein, cytoplasmic (Pabpc) 1: NP\_001080204.1; ePabp (Pabpc1l): NP\_001082094.1; Pabpc4 (MGC80927): NP\_001085857.1.

*Xenopus tropicalis*: Pabpc1: NP\_001005051.1; ePabp (Pabpc1l): NP\_001005062.1; Pabpc4: own prediction made from genomic sequence from *Xenopus* genome assembly version 4.1 (August 2005) and NM\_001015753.1 (mRNA).

*Gallus gallus*: Pabpc1: NP\_001026768.1; ePabp (Pabpc1l): XP\_417367.2; Pabpc4: XP\_417821.2.

*Mus musculus* sequences: Pabpc1: NP\_032800.2; ePabp (Pabpc1l): NP\_001107551.1; Pabpc2: NP\_035163.1; Pabpc4: NP\_570951.2; Pabpc5: NP\_444344.1.

*Homo sapiens* sequences: Pabpc1: NP\_002559.2; ePabp (Pabpc1l): NP\_001118228.1; Pabpc3: NP\_001118228.1; Pabpc4: NP\_001129125.1; Pabpc5: NP\_543022.1.

*Drosophila* sequence: NP\_476667.1.

The protein multiple alignments were done using ClustalW (version 1.83) (5) and visualized using Genedoc (6). The phylogenetic tree was constructed by the neighbor-joining method. The reliability of each interior branch of a given topology was assessed using the bootstrap interior branch test with 1,000 replicates. Phylogenetic trees were constructed using MEGA (version 4.0.2; <http://www.megasoftware.net/>) (7).



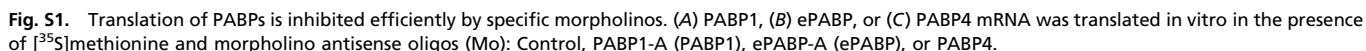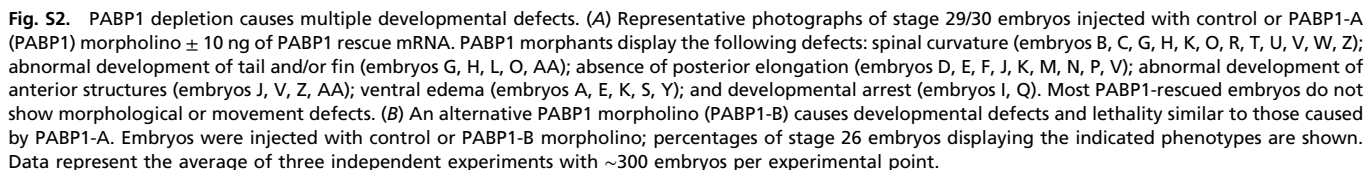

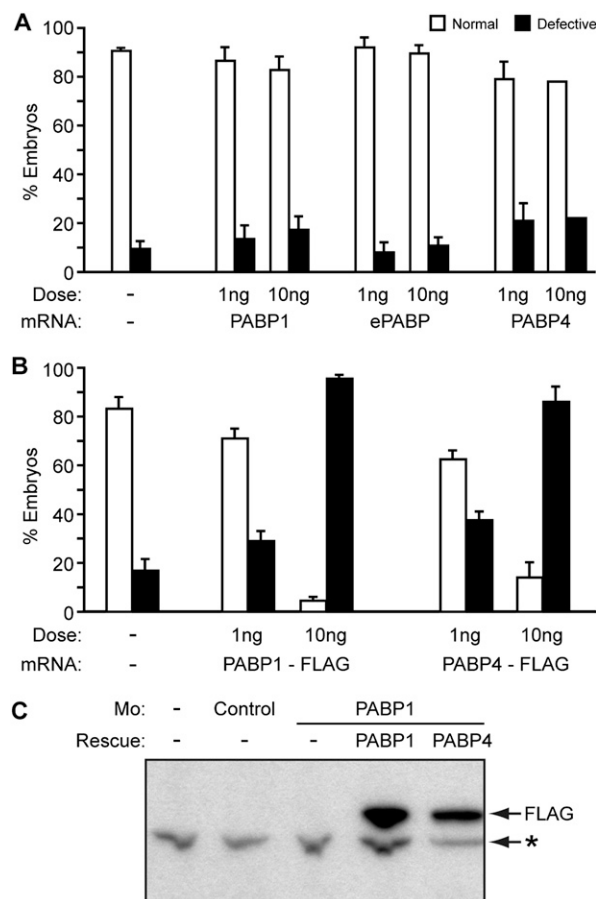

**Fig. S3.** PABP overexpression does not result in early developmental defects. Embryos were injected with (A) 1 ng or 10 ng of mRNA encoding PABP1, ePABP, or PABP4 or (B) 1 ng or 10 ng of mRNA encoding PABP1-FLAG or PABP4-FLAG. Embryos were allowed to develop until stage 47–50; the percentages of normal and defective embryos are shown. In A phenotypic defects were not observed at a significant level over control, permitting their use in rescue experiments. In B the 10-ng dose of PABP1-FLAG and PABP4-FLAG induced embryonic defects, possibly associated with the FLAG-tag. Therefore, the 1-ng dose was used in all FLAG rescue experiments. (C) PABP1-FLAG and PABP4-FLAG proteins are expressed at similar levels. Western blot analysis of whole-cell extracts from stage 16–18 embryos injected with control or PABP1-A (PABP1) morpholino  $\pm$  1 ng of PABP1-FLAG or PABP4-FLAG rescue mRNA, using an anti-FLAG antibody. Asterisk indicates a nonspecific band.

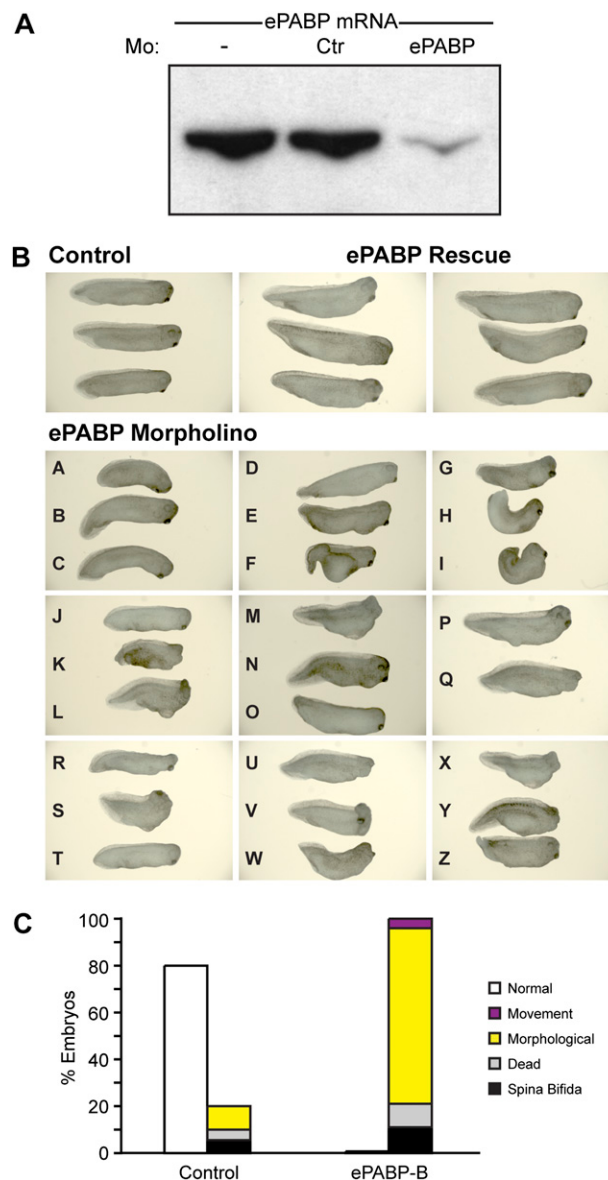

**Fig. 54.** ePABP depletion causes widespread developmental defects. (A) Western blot analysis of whole-cell extracts from stage VI oocytes coinjected with an ePABP-expressing mRNA  $\pm$  control (Ctr) or ePABP-A (ePABP) morpholino, using an ePABP-specific antibody. This shows that ePABP expression is inhibited efficiently in vivo by the morpholino. (B) Representative photographs of stage 30–32 embryos injected with control or ePABP-A morpholino  $\pm$  10 ng of ePABP rescue mRNA. ePABP morphants display the following defects: spinal curvature (embryos A, B, C, H, V, W, Y); abnormal development of tail (embryos D, J); absence of posterior elongation (embryos A, F, G, K, S, Z); abnormal development of anterior structures (embryos K, L, M, Q, R, S, T, U, X, Y); and ventral edema (embryos E, F, I, K, L, M, N, S, Y). Embryo O appears morphologically normal. The majority of ePABP-rescued embryos do not show morphological defects. (C) An alternative ePABP morpholino (ePABP-B) causes the same developmental defects and lethality as ePABP-A. Embryos were injected with control or ePABP-B morpholino; percentages of stage 26–29 embryos displaying the indicated phenotypes are shown. Data represent the average of four independent experiments, with  $\sim$ 500 embryos per experimental point.



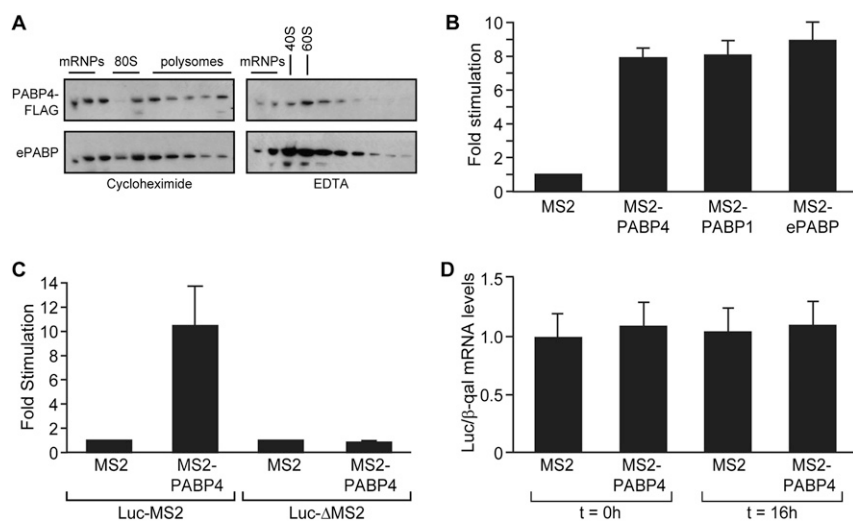

**Fig. S6.** *X. laevis* PABP4 stimulates translation. (A) A proportion of PABP4 associates with polysomes. Stage VI oocytes were injected with PABP4-FLAG-expressing mRNA, and the resulting whole-cell extracts were treated with cycloheximide or EDTA, fractionated on 10–50% sucrose gradients, and Western blotted with an anti-FLAG or anti-ePABP antibody. The positions of messenger ribonucleoprotein complexes (mRNPs), 80S (or 40S and 60S), and polysomes are indicated. Release of PABP4 and endogenous ePABP by EDTA is indicative of sedimentation into the heavier fractions resulting from association with actively translating polysomes. (B) Tethering of PABP4 activates reporter mRNA translation to a similar extent as PABP1 and ePABP. Stage VI oocytes expressing the indicated MS2-fusion protein were coinjected with an unadenylated luciferase reporter mRNA containing 3' UTR MS2 binding sites (Luc-MS2) and a  $\beta$ -galactosidase control mRNA. Luciferase was normalized to  $\beta$ -galactosidase activity, and the fold stimulation relative to MS2 (set to 1) is shown. Changes in  $\beta$ -galactosidase activity normally are <15%. (C) PABP4 stimulates only the translation of reporter mRNAs to which it is tethered. Oocytes were injected as in B, with Luc-MS2 or with an identical reporter lacking the MS2 binding sites (Luc-ΔMS2) and  $\beta$ -galactosidase control mRNA. Data in B and C represent the average stimulations of at least three independent experiments; error bars indicate SEM. (D) Tethering of PABP4 does not affect mRNA stability. Oocytes were injected as in B, with Luc-MS2 and  $\beta$ -galactosidase mRNAs. Total RNA was extracted either immediately or after 16 h and analyzed by quantitative RT-PCR with primers specific for the reporter mRNAs. Normalized luciferase/ $\beta$ -galactosidase values are shown. Data represent the average of two independent experiments; error bars indicate SEM. Thus, the effects of PABP4 are the direct result of changes in mRNA translation and not changes in mRNA stability, as previously shown for PABP1 and ePABP (1, 2).

- Gray NK, Collier JM, Dickson KS, Wickens M (2000) Multiple portions of poly(A)-binding protein stimulate translation in vivo. *EMBO J* 19:4723–4733.
- Wilkie GS, Gautier P, Lawson D, Gray NK (2005) Embryonic poly(A)-binding protein stimulates translation in germ cells. *Mol Cell Biol* 25:2060–2071.

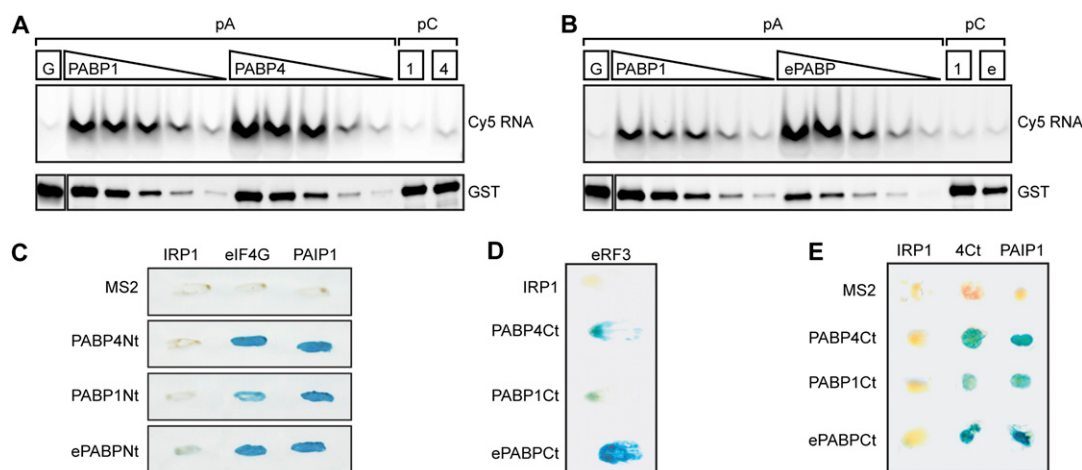

**Fig. S7.** PABP1, ePABP, and PABP4 activate translation through a similar mechanism. (A and B) PABP4, like PABP1 and ePABP, binds poly(A) but not poly(C) RNA efficiently. A range of concentrations (4, 2, 1, 0.5, and 0.25 nM) of GST-PABP1 and (A) GST-PABP4 or (B) GST-ePABP were immobilized on glutathione beads and incubated with 1 nM poly(A) RNA (pA). To control for specificity, 4 nM GST protein (G) was incubated with poly(A) RNA; and 4 nM PABP1 (1), PABP4 (4), and ePABP (e) were incubated with 1 nM poly(C) RNA (pC). After elution, RNA and proteins were detected by fluorescence (Top) and Western blotting with an anti-GST antibody (Bottom), respectively. (C) PABP4 interacts with initiation factors. Yeast two-hybrid analysis with the indicated PABP N termini (Nt) (LexA DNA-binding domain fusions) against eukaryotic initiation factor 4G (eIF4G) and poly(A)-binding protein interacting protein 1 (PAIP1) (Gal4 activation domain fusions) shows that PABP4 maintains these interactions. (D) The translation termination factor eukaryotic release factor 3 (eRF3) also is a PABP4 partner, as shown by yeast two-hybrid analysis with the indicated PABP C termini (Ct) (Gal4 activation domain fusions) against eRF3 (Gal4 DNA-binding domain fusion). (E) PABP4 can interact with itself and other PABP proteins. Yeast two-hybrid analysis with the indicated PABP C termini (LexA DNA-binding domain fusions) against the PABP4 C terminus (4Ct) or PAIP1 (Gal4 activation domain fusions) reveals PABP–PABP interactions. In C–E, iron regulatory protein-1 (IRP1) and MS2 are negative controls. Expression of  $\beta$ -galactosidase (blue) indicates protein–protein interaction.

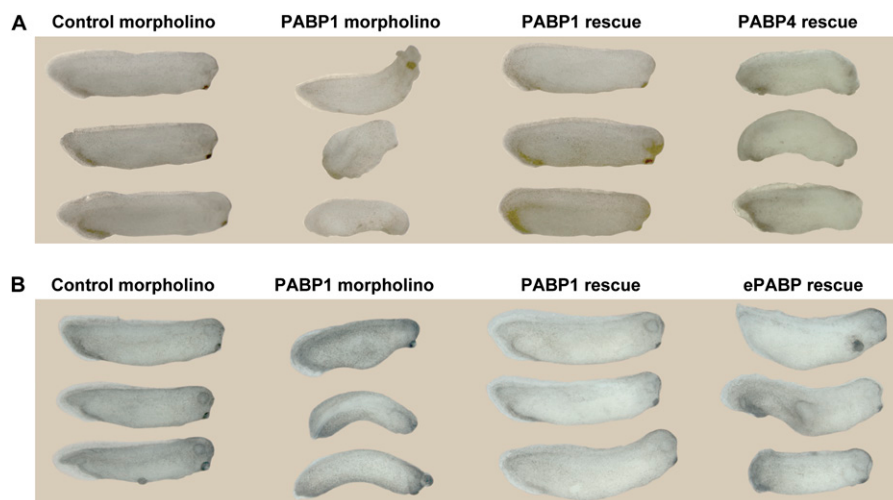

**Fig. 58.** PABP4 and ePABP cannot rescue PABP1-depleted embryos efficiently. (A) Representative photographs of stage 29/30 embryos injected with control or PABP1-A (PABP1) morpholino  $\pm$  1 ng of PABP1-FLAG or PABP4-FLAG rescue mRNA. (B) Representative photographs of stage 29/30 embryos injected with control or PABP1-A morpholino  $\pm$  10 ng of PABP1 or ePABP rescue mRNA.

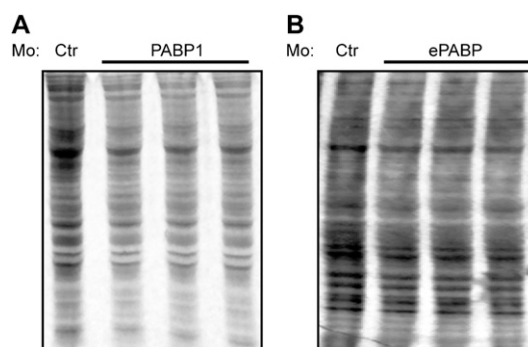

**Fig. 59.** Global protein synthesis is affected in PABP morphants. Protein extracts from triplicate samples of [ $^{35}$ S]methionine-labeled (A) PABP1 and (B) ePABP morphants (from Fig. 2 C and D) were resolved on 10% SDS/PAGE gels, showing that synthesis of a wide range of proteins is decreased compared with control (Ctr). Thus, the loss of newly synthesized proteins in Fig. 2 C and D represents a largely global loss of translation.

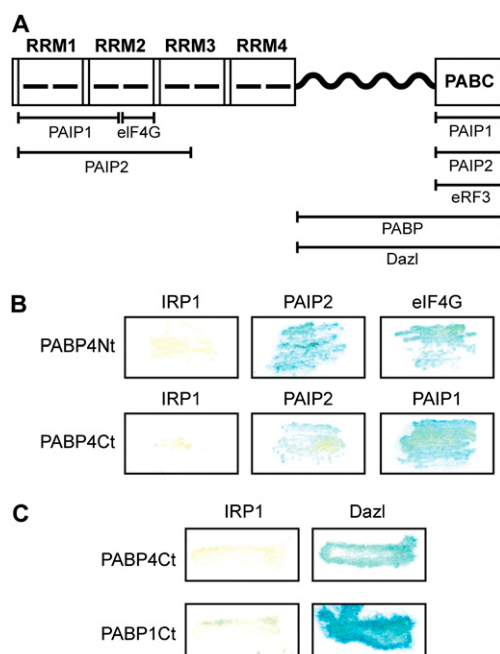

**Fig. S10.** Characterized protein interactions in *X. laevis* are not PABP specific. (A) Domain organization and mapped interactions of *X. laevis* PABP1. RRM1–4 are shown as boxes. Each RRM contains two RNP motifs (RNP1 and RNP2, indicated by lines) that directly contact the mRNA. RRM1 and 2 direct the majority of poly(A) binding. The RNA-binding specificity of RRM3 and 4 is unclear but includes AU-rich sequences. The wavy line represents the variable proline-rich region that links the RRM1s to the PABP C-terminal (PABC) domain (box). Binding sites of characterized interactions with the indicated proteins are depicted below as lines. Most of these interacting proteins are translation factors (including PABP itself) and also interact with ePABP and PABP4 (Fig. S7). Poly(A)-binding protein interacting protein 2 (PAIP2) is a negative regulator of PABP function (1), and Deleted in Azoospermia-like (Dazl) is an mRNA-specific binding protein that directly recruits PABP to target mRNAs (2). (B) PAIP2 interacts with *X. laevis* PABP1 and ePABP (3), and yeast two-hybrid analysis reveals that PAIP2 interacts similarly with both the N- and C-terminal domains of PABP4, suggesting that it does not underlie PABP specificity. (C) Yeast two-hybrid analysis shows that *X. laevis* Dazl interacts with the C terminus of PABP4 in addition to its published interactions with PABP1 and ePABP (2). Thus, this C-terminal-interacting protein, which mediates mRNA-specific translation, cannot explain the requirement for individual PABPs. In keeping with this notion, Dazl knockdown in *X. laevis* results only in a loss of germ cells and not in lethality (4).

1. Khaleghpour K, et al. (2001) Translational repression by a novel partner of human poly(A) binding protein, Paip2. *Mol Cell* 7:205–216.
2. Collier B, Gorgoni B, Loveridge C, Cooke HJ, Gray NK (2005) The DAZL family proteins are PABP-binding proteins that regulate translation in germ cells. *EMBO J* 24:2656–2666.
3. Kim JH, Richter JD (2007) RINGO/cdk1 and CPEB mediate poly(A) tail stabilization and translational regulation by ePAB. *Genes Dev* 21:2571–2579.
4. Houston DW, King ML (2000) A critical role for Xdazl, a germ plasm-localized RNA, in the differentiation of primordial germ cells in *Xenopus*. *Development* 127:447–456.
